# Supplementary material for: Translation of the international outcome inventory for hearing aids into Portuguese from Portugal
Source: PubMed Central journal article supplement — BMJ Open. 2017 Mar 6;7(3):e013784. doi: 10.1136/bmjopen-2016-013784 (PMC5353264; doi:10.1136/bmjopen-2016-013784), 2017-03-06
Supplement: bmjopen-2016-013784supp_appendices.pdf [file bmjopen-2016-013784supp_appendices.pdf]

**Appendix 1- International Outcome Inventory for Hearing Aids (IOI-HA)**

1. Think about how much you used your present hearing aid(s) over the past two weeks. On an average day, how many hours did you use the hearing aid(s)?

|                          |                          |                          |                          |                          |
|--------------------------|--------------------------|--------------------------|--------------------------|--------------------------|
| none                     | less than 1 hour a day   | 1 to 4 hours a day       | 4 to 8 hours a day       | more than 8 hours a day  |
| <input type="checkbox"/> |

2. Think about the situation where you most wanted to hear better, before you got your present hearing aid(s). Over the past two weeks, how much has the hearing aid helped in those situations?

|                          |                          |                          |                          |                          |
|--------------------------|--------------------------|--------------------------|--------------------------|--------------------------|
| helped not at all        | helped slightly          | helped moderately        | helped quite a lot       | helped very much         |
| <input type="checkbox"/> |

3. Think again about the situation where you most wanted to hear better. When you use your present hearing aid(s), how much difficulty do you STILL have in that situation?

|                          |                           |                          |                          |                          |
|--------------------------|---------------------------|--------------------------|--------------------------|--------------------------|
| very much difficulty     | quite a lot of difficulty | moderate difficulty      | Slight difficulty        | no difficulty            |
| <input type="checkbox"/> | <input type="checkbox"/>  | <input type="checkbox"/> | <input type="checkbox"/> | <input type="checkbox"/> |

4. Considering everything, do you think your present hearing aid(s) is worth the trouble?

|                          |                          |                          |                          |                          |
|--------------------------|--------------------------|--------------------------|--------------------------|--------------------------|
| not at all worth it      | Slightly worth it        | Moderately worth it      | quite a lot worth it     | very much worth it       |
| <input type="checkbox"/> |

5. Over the past two weeks, with your present hearing aid(s), how much have your hearing difficulties affected the things you can do?

|                          |                          |                          |                          |                          |
|--------------------------|--------------------------|--------------------------|--------------------------|--------------------------|
| affected very<br>much    | affected<br>quite a lot  | affected<br>moderately   | affected<br>slightly     | affected not<br>at all   |
| <input type="checkbox"/> |

6. Over the past two weeks, with your present hearing aid(s), how much do you think other people were bothered by your hearing difficulties?

|                          |                          |                          |                          |                          |
|--------------------------|--------------------------|--------------------------|--------------------------|--------------------------|
| bothered<br>very much    | bothered<br>quite a lot  | bothered<br>moderately   | bothered<br>slightly     | bothered not<br>at all   |
| <input type="checkbox"/> |

7. Considering everything, how much has your present hearing aid(s) changed your enjoyment of life?

|                          |                          |                          |                          |                          |
|--------------------------|--------------------------|--------------------------|--------------------------|--------------------------|
| worse                    | no change                | slightly<br>better       | quite a lot<br>better    | Very much<br>better      |
| <input type="checkbox"/> |

8. How much hearing difficulty do you have when you are **not** wearing a hearing aid?

|                          |                          |                          |                          |                          |
|--------------------------|--------------------------|--------------------------|--------------------------|--------------------------|
| severe                   | moderately-<br>severe    | moderate                 | mild                     | none                     |
| <input type="checkbox"/> |

Norms for the IOI-HA

Cox, Alexander, & Beyer, 2002

| Item         | Individual clients           |                            | Groups of clients            |                        |
|--------------|------------------------------|----------------------------|------------------------------|------------------------|
|              | Mild-moderate<br>lower/upper | Mod-severe+<br>lower/upper | Mild-<br>moderate<br>mean/SD | Mod-severe+<br>mean/SD |
| 1. use       | 3/5                          | 4/5                        | 3.73/1.17                    | 4.5/.96                |
| 2. benefit   | 3/4                          | 3/4                        | 3.39/.98                     | 3.52/1.08              |
| 3. RAL       | 3/4                          | 2/4                        | 3.4/.95                      | 3.19/1.05              |
| 4. satisfac. | 2/4                          | 3/5                        | 3.2/1.21                     | 3.84/1.17              |
| 5.RPR        | 3/4                          | 3/4                        | 3.57/1.13                    | 3.38/1.11              |
| 6.imp-oth    | 3/5                          | 2/4                        | 3.79/1.13                    | 3.38/1.1               |
| 7. QofLife   | 3/4                          | 3/4                        | 3.19/.93                     | 3.68/1.02              |

The category of norms used should depend on the patient's answer to the 8<sup>th</sup> item of the questionnaire. If they choose "none", "mild" or "moderate", use the "mild/moderate" norms. For the other 2 options, use the "mod/severe" norms.

The norms for individual clients are the middle 50% of the data. Hearing aids were: Single-channel, single-memory, ITE; All bilateral fittings; All compression (any type); standard fitting protocol; Purchased between Aug/00 & Jan/01.

## Appendix 2 - Questionário Internacional – Aparelhos Auditivos (QI-AA)

1. Nas últimas duas semanas, pense no tempo em que usou o(s) aparelho(s) auditivo(s). Durante quantas horas usou o(s) aparelho (s) de audição num dia normal?

|                          |                          |                          |                          |                          |
|--------------------------|--------------------------|--------------------------|--------------------------|--------------------------|
|                          | menos do que 1           | entre 1 e 4 horas        | entre 4 e 8 horas        | mais do que 8            |
| nunca                    | hora por dia             | por dia                  | por dia                  | horas por dia            |
| <input type="checkbox"/> |

2. Pense em que situação gostaria de ouvir melhor, antes de obter o(s) seu(s) aparelho(s) auditivo(s). Como é que o(s) aparelho(s) o ajudaram nessa mesma situação, nas duas ultimas semanas?

|                          |                          |                          |                          |                          |
|--------------------------|--------------------------|--------------------------|--------------------------|--------------------------|
| não                      |                          |                          |                          | ajudou/ajudaram          |
| ajudou/ajudaram          | pouco                    | ligeiramente             | bastante                 | muito                    |
| <input type="checkbox"/> |

3. Pense novamente na mesma situação em que gostaria de ouvir melhor, antes de obter o(s) seu(s) aparelho(s) auditivo(s). Quando usa o(s) seu(s) aparelho(s) auditivo(s), nessa situação, que grau de dificuldade AINDA sente?

|                          |                          |                          |                          |                          |
|--------------------------|--------------------------|--------------------------|--------------------------|--------------------------|
| muita                    | bastante                 | alguma                   | ligeira                  | sem                      |
| dificuldade              | dificuldade              | dificuldade              | dificuldade              | dificuldade              |
| <input type="checkbox"/> |

4. Tendo em conta todas as vantagens e desvantagens, acha que vale a pena usar o(s) aparelho(s) auditivo(s)?

|                          |                          |                          |                          |                          |
|--------------------------|--------------------------|--------------------------|--------------------------|--------------------------|
| não vale a pena          | vale pouco a pena        | vale ligeiramente a pena | vale bastante a pena     | vale muito a pena        |
| <input type="checkbox"/> |

5. Nas duas ultimas semanas usando o(s) aparelhos(s) auditivo(s), quanto é que a sua dificuldade em ouvir afetou as suas atividades diárias?

|                          |                          |                          |                          |                          |
|--------------------------|--------------------------|--------------------------|--------------------------|--------------------------|
|                          |                          | afetou                   | afetou                   |                          |
| afetou muito             | afetou bastante          | moderadamente            | ligeiramente             | não afetou               |
| <input type="checkbox"/> |

6. Nas últimas duas semanas, com o(s) seu(s) atual aparelho(s) auditivo(s), quanto pensa que a sua dificuldade em ouvir possa ter incomodado outras pessoas?

|                          |                          |                          |                          |                          |
|--------------------------|--------------------------|--------------------------|--------------------------|--------------------------|
| incomodou                | incomodou                | incomodou                | incomodou                | não                      |
| muito                    | bastante                 | moderadamente            | ligeiramente             | incomodou                |
| <input type="checkbox"/> |

7. Considerando tudo, como é que lhe parece que o(s) seu(s) aparelho(s) auditivo(s) teve(tiveram) influencia na sua alegria de viver?

|                          |                          |                          |                          |                          |
|--------------------------|--------------------------|--------------------------|--------------------------|--------------------------|
| pioraram                 | sem alteração            | ligeiramente             | bastante                 | muito                    |
|                          |                          | melhor                   | melhor                   | melhor                   |
| <input type="checkbox"/> |

8. Como classifica a sua dificuldade em ouvir quando não esta a usar o(s) seu(s) aparelho(s) auditivo(s)?

|                          |                          |                          |                          |                          |
|--------------------------|--------------------------|--------------------------|--------------------------|--------------------------|
| grave                    | severa a                 | moderada                 | ligeira                  | nenhuma                  |
|                          | moderada                 |                          |                          |                          |
| <input type="checkbox"/> |

Portuguese Version (from Portugal)

| Item                                           | Doentes individuais               |                                   | Grupos de doentes                                  |                                                 |
|------------------------------------------------|-----------------------------------|-----------------------------------|----------------------------------------------------|-------------------------------------------------|
|                                                | Ligeira-Moderada<br>Mínimo/Máximo | Moderada-Severa+<br>Mínimo/Máximo | Ligeira-<br>moderada<br>Média/<br>Desvio<br>Padrão | Moderada-<br>severa+<br>Media/<br>Desvio Padrão |
| 1. Utilização                                  | 1/5                               | 3/5                               | 4.55/0.84                                          | 4.33/1.16                                       |
| 2. Benefício                                   | 1/5                               | 3/4                               | 3.88/1.04                                          | 3.67/0.58                                       |
| 3.(LAR)<br>Limitações<br>atividade<br>residual | 1/5                               | 2/4                               | 3.21/1.04                                          | 2.67/1.16                                       |
| 4. Satisfação                                  | 1/5                               | 3/4                               | 4.09/1.05                                          | 3.67/0.58                                       |
| 5. Restrição<br>de<br>Participação<br>Residual | 1/5                               | 3/5                               | 3.91/1.03                                          | 4/1                                             |
| 6. Impacto<br>sobre outros                     | 1/5                               | 3/5                               | 3.97/1.15                                          | 4/1                                             |
| 7. Q. Vida                                     | 2/5                               | 3/4                               | 3.75/0.99                                          | 3.67/0.58                                       |

A categoria de normas dependem da resposta ao item nº.8.  
 No caso de escolherem “nenhuma” “ligeira” ou “moderada”, use as normas “ligeira/moderada”.  
 Para as outras duas opções use as normas “moderada/severa”.

As normas para doentes individuais são a media em 50% do total dos dados.  
 Para próteses auditivas: Canal Único; Memoria Única, ITE (Intra-canal), todo o tipo de próteses  
 com compressão (qualquer tipo), com protocolo *standard* de adaptação

*Nota: Para obter os resultados, as respostas da esquerda para a direita são classificadas de 1 a 5. Os valores no final são adicionados. Valores mais elevados indicam um resultado mais favorável.*
